# Supplementary material for: Willingness to accept COVID-19 vaccination among people living with HIV in a high HIV prevalence community
Source: BMC Public Health. 2022 Jun 22;22:1239. doi: 10.1186/s12889-022-13623-w (PMC9214683; doi:10.1186/s12889-022-13623-w)
Supplement: Supplementary file 1 — Additional file 1. COVID-19 telephone questionnaire. [file 12889_2022_13623_MOESM1_ESM.pdf]

Today's Date: day / month / year Study ID: \_\_\_\_\_

Interviewer ID: \_\_\_\_\_ Location/Facility: \_\_\_\_\_

**South Africa's new Central Chronic Medicine Dispensing and Distribution Program:  
assessing the clinic, patient and community impact**

**Participant Phone Interview  
CCMDD COVID-19 Supplement**

| <b>A. PATIENT DATA (Collected from REDCAP)</b> |                                                         |                                                                          |      |
|------------------------------------------------|---------------------------------------------------------|--------------------------------------------------------------------------|------|
| A1                                             | Participant name:                                       | [Pulled from current form]                                               |      |
| A2                                             | Participant SA ID number:                               | _____<br><i>Missing: 9s throughout</i> [Pulled from current form]        |      |
| A3                                             | Participant Date of Birth:                              | DD / MM / YYYY [Pulled from current form]                                |      |
| A4                                             | Participant Cell number:                                | (____) _____<br><i>Missing: 9s throughout</i> [Pulled from current form] |      |
| A5                                             | Did the participant provide COVID supplement interview? | Yes.....1<br>No.....2                                                    | →END |

| <b>B. PREPOPULATION: CCMDD DATA (Collected from REDCAP)</b> |                                   |                            |  |
|-------------------------------------------------------------|-----------------------------------|----------------------------|--|
| B1                                                          | Date enrolled into CCMDD program: | [Pulled from current form] |  |
| B2                                                          | Name of chosen pick-up point:     | [Pulled from current form] |  |

| <b>C. BEGINNING OF PHONE INTERVIEW</b>                                                                                                                                                                                                                                                                                                                                                                                                                                                                                                                                                                                                                  |  |  |  |
|---------------------------------------------------------------------------------------------------------------------------------------------------------------------------------------------------------------------------------------------------------------------------------------------------------------------------------------------------------------------------------------------------------------------------------------------------------------------------------------------------------------------------------------------------------------------------------------------------------------------------------------------------------|--|--|--|
| <p>RA: Hello, this is <u>RA's Name</u> calling from Ithembalabantu Clinic. Is this Mr/Miss/Mrs John Doe?</p> <p><i>Patient: Yes, this is John Doe.</i></p> <p>RA: Sir/ Ma'am, thank you. To protect the safety and privacy of our patients, I would just like to confirm your date of birth. Can you please tell me your date of birth?</p> <p><i>If the patient is unable to confirm the correct date of birth, the RA will thank the patient for their time, and indicate that the date the patient has provided does not match the date on the study records and, to avoid any breach of confidentiality, cannot proceed with the interview.</i></p> |  |  |  |

Location/Facility: \_\_\_\_\_

Finally, this interview will take about 20-30 minutes. At the end, we will give you 50 South African Rand for participating. Do you voluntarily choose to enroll with the understanding that you may decline or stop answering this questionnaire at any time?

|    |                                                                     |                                                                                                                                                             |                |
|----|---------------------------------------------------------------------|-------------------------------------------------------------------------------------------------------------------------------------------------------------|----------------|
| D1 | Are you currently getting ARV medication through the CCMDD program? | No.....0<br>Yes.....1<br>Refused.....-1                                                                                                                     | →D6<br><br>→D6 |
| D2 | How far is your home from your usual CCMDD pick-up point?           | Less than 5 kilometers.....1<br>5 to 10 kilometers.....2<br>10 to 30 kilometers.....3<br>More than 30 kilometers.....4<br>Refused..... -1<br>Unknown.....-2 |                |

Location/Facility: \_\_\_\_\_

Date of BREC Approval: 11NOV2020  
Clean Version

Location/Facility: \_\_\_\_\_

Date of BREC Approval: 11NOV2020  
Clean Version

Today's Date: **day / month / year**

Study ID: \_\_\_\_\_

Interviewer ID: \_\_\_\_\_

Location/Facility: \_\_\_\_\_

|     |                                                                                                                                                                        |                                                                                                                                                                                                                                                                                                                                                                                                                                                 |       |
|-----|------------------------------------------------------------------------------------------------------------------------------------------------------------------------|-------------------------------------------------------------------------------------------------------------------------------------------------------------------------------------------------------------------------------------------------------------------------------------------------------------------------------------------------------------------------------------------------------------------------------------------------|-------|
|     |                                                                                                                                                                        | -1, Refused                                                                                                                                                                                                                                                                                                                                                                                                                                     | → D11 |
| D10 | <p>If you have missed picking up your ARV medication, what are the reasons?<br/>(Check all that apply)</p>                                                             | <p>Transportation availability.....1</p> <p>Transportation cost.....2</p> <p>Safety concerns.....3</p> <p>COVID-19 infection risk.....4</p> <p>Busy with work.....5</p> <p>Busy with family.....6</p> <p>Illness – self.....7</p> <p>Illness – family.....8</p> <p>Concern that pick-up point is closed.....9</p> <p>Pick-up point closed/no staff present.....10</p> <p>Other.....99</p> <p>If OTHER, specify: _____</p> <p>Refused.....-1</p> |       |
| D11 | <p>Many people find it difficult to take all their HIV medications as prescribed.</p> <p>How many doses of your HIV medication have you missed in the last 7 days?</p> | <p>___ doses</p> <p>Don't know.....-2</p> <p>Refused.....-1</p> <p>[Drop down with numbers 00-14, -2, -1]</p>                                                                                                                                                                                                                                                                                                                                   |       |

Today's Date: day / month / year

Study ID: \_\_\_\_\_

Interviewer ID: \_\_\_\_\_

Location/Facility: \_\_\_\_\_

|                                                                                                                                                                                                                                                                                             |                                                                                                                     |                                                                                                                                                                                                                                                                                                                                                                                          |                    |
|---------------------------------------------------------------------------------------------------------------------------------------------------------------------------------------------------------------------------------------------------------------------------------------------|---------------------------------------------------------------------------------------------------------------------|------------------------------------------------------------------------------------------------------------------------------------------------------------------------------------------------------------------------------------------------------------------------------------------------------------------------------------------------------------------------------------------|--------------------|
| D12                                                                                                                                                                                                                                                                                         | When is your next scheduled date to pick up your ARV medication?                                                    | __ / __ / ____<br>(dd / mmm / yyyy)<br>[Day: 01-31; <i>Unknown if unknown</i> (pull down)]<br>Month: Jan, Feb, Mar, Apr, May, Jun, Jul, Aug, Sep, Oct, Nov, Dec; <i>Unknown if unknown</i> (pull down)<br>Year: 2015-2023; <i>Unknown if unknown</i> (pull down)]<br><i>Date check – date should not be before today</i>                                                                 |                    |
| D13                                                                                                                                                                                                                                                                                         | Moving forward, do you have any new concerns about picking up your ARV medication?<br><i>(Check all that apply)</i> | Transportation availability.....1<br>Transportation cost.....2<br>Safety concerns.....3<br>COVID-19 infection risk.....4<br>Busy with work.....5<br>Busy with family.....6<br>Illness – self.....7<br>Illness – family.....8<br>Concern that pick-up point is closed.....9<br>Pick-up point closed/no staff present.....10<br>Other.....11<br>If OTHER, specify: _____<br>Refused.....-1 |                    |
| <b>E. PHONE: COVID-19 Knowledge and Stigma</b>                                                                                                                                                                                                                                              |                                                                                                                     |                                                                                                                                                                                                                                                                                                                                                                                          |                    |
| We are now going to ask you about your current knowledge about the “novel coronavirus”, the new virus called SARS-CoV-2, which causes a disease called “COVID-19”, that has been impacting our community recently. For the rest of the questionnaire I will refer to this as “coronavirus”. |                                                                                                                     |                                                                                                                                                                                                                                                                                                                                                                                          |                    |
| E1                                                                                                                                                                                                                                                                                          | Have you heard of coronavirus?                                                                                      | No.....0<br>Yes.....1<br>Refused.....-1                                                                                                                                                                                                                                                                                                                                                  | →F1<br><br><br>→F1 |

Location/Facility: \_\_\_\_\_

|    |                                                                                     |                                                                                                                                                                                                                                                                                                                                                                         |  |
|----|-------------------------------------------------------------------------------------|-------------------------------------------------------------------------------------------------------------------------------------------------------------------------------------------------------------------------------------------------------------------------------------------------------------------------------------------------------------------------|--|
| E2 | Where do you get most of your information on coronavirus?<br>(Check all that apply) | Newspaper/news websites.....1<br>Radio.....2<br>TV.....3<br>DOH/Government Website.....4<br>Social media.....5<br>Other websites.....6<br>Friends/Family.....7<br>Posters.....8<br>Clinics (materials, staff).....9<br>Schools.....10<br>Church.....11<br>Billboards.....12<br>Traditional healers.....13<br>Other.....99<br>If OTHER, specify: _____<br>Refused.....-1 |  |
| E3 | What symptoms do you associate with coronavirus?<br>(Check all that apply)          | Cough.....1<br>Chest tightness/difficulty breathing.....2<br>Sore throat.....3<br>Muscle aches.....4<br>Fever.....5<br>Headache.....6<br>Stomach pain.....7<br>Congestion (runny nose).....8<br>Rash.....9<br>Joint aches.....10<br>Other.....99<br>If OTHER, specify: _____                                                                                            |  |

Today's Date: day / month / year Study ID: \_\_\_\_\_

Interviewer ID: \_\_\_\_\_ Location/Facility: \_\_\_\_\_

|                          |                                                                                              |                                                                                                                                                                                                                                                                                                                                                                                                                                                                                                                                                                                                                                                                                         |                   |
|--------------------------|----------------------------------------------------------------------------------------------|-----------------------------------------------------------------------------------------------------------------------------------------------------------------------------------------------------------------------------------------------------------------------------------------------------------------------------------------------------------------------------------------------------------------------------------------------------------------------------------------------------------------------------------------------------------------------------------------------------------------------------------------------------------------------------------------|-------------------|
|                          |                                                                                              | Refused.....-1                                                                                                                                                                                                                                                                                                                                                                                                                                                                                                                                                                                                                                                                          |                   |
| E4                       | If you were to have symptoms of coronavirus, what would you do?<br>(Check all that apply)    | Stay at home.....1<br>Call/go to clinic.....2<br>Go to church.....3<br>Go to traditional healer.....4<br>COVID hotline.....5<br>DOH COVID WhatsApp.....6<br>Other.....99<br>If OTHER, specify: _____<br>Refused.....-1                                                                                                                                                                                                                                                                                                                                                                                                                                                                  |                   |
| <b>Vaccine Hesitancy</b> |                                                                                              |                                                                                                                                                                                                                                                                                                                                                                                                                                                                                                                                                                                                                                                                                         |                   |
| E5                       | Did you vaccinate yourself against seasonal influenza in 2019?                               | No.....0<br>Yes.....1<br>Unsure.....-2<br>Refused.....-1                                                                                                                                                                                                                                                                                                                                                                                                                                                                                                                                                                                                                                | →E7<br>→E7<br>→E7 |
| E6                       | If no, why not?<br>(instructions: leave open-ended, do not prompt or provide answer options) | Did not think it was needed.....1<br>Did not know where to get vaccination.....2<br>Did not know where to get good/reliable information.....3<br>Heard or read negative media.....4<br>Did not think the vaccine was effective.....5<br>Did not think the vaccine was safe/concerned about side effects...6<br>Had a bad experience with previous vaccinator/health clinic.....7<br>Had a bad experience or reaction with previous vaccination.....8<br>Someone else told me they/their child had a bad reaction.....9<br>Fear of needles.....10<br>Not possible to leave other work (at home or other).....11<br>Religious reasons.....12<br>Other beliefs/traditional medicine.....13 |                   |

Today's Date: day / month / year

Study ID: \_\_\_\_\_

Interviewer ID: \_\_\_\_\_

Location/Facility: \_\_\_\_\_

|    |                                                                                                                                          |                                                                                                                                                                                                                                                                                                                                                                                                                                                                                                                                                                                                                           |  |
|----|------------------------------------------------------------------------------------------------------------------------------------------|---------------------------------------------------------------------------------------------------------------------------------------------------------------------------------------------------------------------------------------------------------------------------------------------------------------------------------------------------------------------------------------------------------------------------------------------------------------------------------------------------------------------------------------------------------------------------------------------------------------------------|--|
|    |                                                                                                                                          | My doctor told me I am not a candidate for vaccination.....14<br>No time to get vaccinated.....15<br>I am allergic.....16<br>Cost of vaccine.....17<br>Cost of travel to vaccination site.....18<br>Distance to vaccination site.....19<br>Vaccination site hours.....20<br>Vaccination site wait time.....21<br>Other.....99<br>If OTHER, specify: _____<br>Refused.....-1                                                                                                                                                                                                                                               |  |
| E7 | Do you intend to accept future COVID-19 vaccination for yourself?                                                                        | No.....0<br>Yes.....1<br>Unsure.....-2<br>Refused.....-1                                                                                                                                                                                                                                                                                                                                                                                                                                                                                                                                                                  |  |
| E8 | What are your concerns regarding a future COVID-19 vaccine?<br>(instructions: leave open-ended, do not prompt or provide answer options) | Fear of side effects.....1<br>Fear of getting associated COVID-19 illness.....2<br>Want to wait until vaccine is tested by others.....3<br>Fear of taking vaccine while pregnant.....4<br>Do not think the vaccine will be effective.....5<br>Vaccine is unnecessary because COVID-19 symptoms are mostly mild.....6<br>Vaccine is unnecessary because biological (natural) immunity is better.....7<br>Cost of vaccine will be high.....8<br>Will not be able to afford cost of travel to vaccination site.....9<br>Expect long distance to vaccination site.....10<br>Expect inconvenient vaccination site hours.....11 |  |

Today's Date: day / month / year

Study ID: \_\_\_\_\_

Interviewer ID: \_\_\_\_\_

Location/Facility: \_\_\_\_\_

|  |  |                                                      |
|--|--|------------------------------------------------------|
|  |  | Expect long vaccination site wait time/queues.....12 |
|  |  | Worried about the origins of the vaccine.....13      |
|  |  | No concerns.....98                                   |
|  |  | Other.....99                                         |
|  |  | If OTHER, specify: _____                             |
|  |  | Refused.....-1                                       |

Questions E9-E12 ask about any vaccine or vaccines in general. Questions E13-E15 are specific to the COVID-19 vaccine. Please tell us how much you agree or disagree with the following statements:

|     |                                                                              | Strongly disagree | Slightly disagree | Neither disagree nor agree or unsure | Slightly agree | Strongly agree | N/A |
|-----|------------------------------------------------------------------------------|-------------------|-------------------|--------------------------------------|----------------|----------------|-----|
| E9  | Vaccines are important for children to have.                                 | 1                 | 2                 | 3                                    | 4              | 5              | -99 |
| E10 | Overall, I think vaccines are safe.                                          | 1                 | 2                 | 3                                    | 4              | 5              | -99 |
| E11 | Overall, I think vaccines are effective.                                     | 1                 | 2                 | 3                                    | 4              | 5              | -99 |
| E12 | Vaccines are compatible with my religious beliefs                            | 1                 | 2                 | 3                                    | 4              | 5              | -99 |
| E13 | If a vaccine were available to prevent COVID-19, I would not want to get it. | 1                 | 2                 | 3                                    | 4              | 5              | -99 |
| E14 | If a vaccine were available to prevent COVID-19, I would not trust it.       | 1                 | 2                 | 3                                    | 4              | 5              | -99 |
| E15 | If a vaccine were available to prevent COVID-19, I am                        | 1                 | 2                 | 3                                    | 4              | 5              | -99 |

Location/Facility: \_\_\_\_\_

|                                                                                         |                   |          |          |       |                |                      |
|-----------------------------------------------------------------------------------------|-------------------|----------|----------|-------|----------------|----------------------|
| worried that it could be harmful.                                                       |                   |          |          |       |                |                      |
| <b>COVID-19 Mistrust/Misinformation Scale</b>                                           |                   |          |          |       |                |                      |
| Please tell us how much you agree or disagree with the following statements:            |                   |          |          |       |                |                      |
|                                                                                         | Strongly disagree | Disagree | Not sure | Agree | Strongly agree | Prefer not to answer |
| The government cannot be trusted to tell the truth about coronavirus.                   | 1                 | 2        | 3        | 4     | 5              | -1                   |
| I trust the public health measures that the government is taking to combat coronavirus. | 1                 | 2        | 3        | 4     | 5              | -1                   |
| Information about coronavirus is being withheld from the public.                        | 1                 | 2        | 3        | 4     | 5              | -1                   |
| I trust the information that I am hearing on the radio and TV about coronavirus.        | 1                 | 2        | 3        | 4     | 5              | -1                   |
| I trust the information that I am reading about coronavirus.                            | 1                 | 2        | 3        | 4     | 5              | -1                   |
| I trust that the doctors and nurses in clinics know how to treat coronavirus.           | 1                 | 2        | 3        | 4     | 5              | -1                   |
| I trust traditional healers more than clinic workers to treat coronavirus.              | 1                 | 2        | 3        | 4     | 5              | -1                   |

Location/Facility: \_\_\_\_\_

|     |                                                                                        |                                                                                                                                                                                                                                                                                                                                                                                                                                                                                                                                                                 |   |   |   |   |                  |
|-----|----------------------------------------------------------------------------------------|-----------------------------------------------------------------------------------------------------------------------------------------------------------------------------------------------------------------------------------------------------------------------------------------------------------------------------------------------------------------------------------------------------------------------------------------------------------------------------------------------------------------------------------------------------------------|---|---|---|---|------------------|
| E23 | I trust church leaders more than clinic workers to treat coronavirus.                  | 1                                                                                                                                                                                                                                                                                                                                                                                                                                                                                                                                                               | 2 | 3 | 4 | 5 | -1               |
| E24 | What are your concerns about coronavirus?<br>(Check all that apply)                    | Becoming infected myself.....1<br>Family member becoming infected.....2<br>Lack of transport to work.....3<br>Lack of transport to clinic.....4<br>Lack of transport to CCMDD pick-up point.....5<br>Lack of transport elsewhere.....6<br>Unable to work.....7<br>Food running out.....8<br>Money running out.....9<br>Crime.....10<br>Domestic violence.....11<br>Lack of information.....12<br>Stigma.....13<br>Afraid to move.....14<br>Unavailability of sanitizer/protective equipment....15<br>Other.....99<br>If OTHER, specify: _____<br>Refused.....-1 |   |   |   |   |                  |
| E25 | Have you changed any of your normal daily activities since learning about coronavirus? | No.....0<br>Yes.....1<br>Refused.....-1                                                                                                                                                                                                                                                                                                                                                                                                                                                                                                                         |   |   |   |   | →E16<br><br>→E16 |
| E26 | How have you changed your normal daily activities since learning about coronavirus?    | Stopped taking taxis/public transport.....1<br>Avoiding people who present symptoms.....2<br>Not greeting other people.....3                                                                                                                                                                                                                                                                                                                                                                                                                                    |   |   |   |   |                  |

Today's Date:      **day / month / year**

Study ID:      \_\_\_\_\_

Interviewer ID:      \_\_\_\_\_

Location/Facility:      \_\_\_\_\_

|     |                                                                         |                                                                                                                                                                                                                                                                                                                                                                                                                                                                                                          |                    |
|-----|-------------------------------------------------------------------------|----------------------------------------------------------------------------------------------------------------------------------------------------------------------------------------------------------------------------------------------------------------------------------------------------------------------------------------------------------------------------------------------------------------------------------------------------------------------------------------------------------|--------------------|
|     | <i>(Check all that apply)</i>                                           | Not hugging other people.....4<br>Visiting the clinic less.....5<br>Visiting the pharmacy less.....6<br>Not going to work.....7<br>Not going outside.....8<br>Avoiding large gatherings.....9<br>Avoiding family members.....10<br>Avoiding friends.....11<br>Self-isolation.....12<br>Washing hands more.....13<br>Not touching face.....14<br>Using hand sanitizer frequently.....15<br>Wearing a mask.....16<br>Living elsewhere.....17<br>Other.....99<br>If OTHER, specify: _____<br>Refused.....-1 |                    |
| E27 | Have you delayed picking up your ARV medication because of coronavirus? | No.....0<br>Yes.....1<br>Refused.....-1                                                                                                                                                                                                                                                                                                                                                                                                                                                                  | → E18<br><br>→ E18 |

Today's Date:      day / month / year

Study ID:      \_\_\_\_\_

Interviewer ID:      \_\_\_\_\_

Location/Facility:      \_\_\_\_\_

|     |                                                                                                     |                                                                                                                                                                                                                                                                                                                                                                                          |                          |
|-----|-----------------------------------------------------------------------------------------------------|------------------------------------------------------------------------------------------------------------------------------------------------------------------------------------------------------------------------------------------------------------------------------------------------------------------------------------------------------------------------------------------|--------------------------|
| E28 | If you have delayed picking up your ARV medication, what are the reasons?<br>(Check all that apply) | Transportation availability.....1<br>Transportation cost.....2<br>Safety concerns.....3<br>COVID-19 infection risk.....4<br>Busy with work.....5<br>Busy with family.....6<br>Illness – self.....7<br>Illness – family.....8<br>Concern that pick-up point is closed.....9<br>Pick-up point closed/no staff present.....10<br>Other.....99<br>If OTHER, specify: _____<br>Refused.....-1 |                          |
| E29 | Has your experience picking up ARV medication changed in any way because of coronavirus?            | No.....0<br>Yes.....1<br>Have not been to pick-up point recently....2<br>Refused.....-1                                                                                                                                                                                                                                                                                                  | →E27<br><br>→E28<br>→E27 |
| E30 | Has your pick-up point location changed because of coronavirus?                                     | No.....0<br>Yes.....1<br>Refused.....-1                                                                                                                                                                                                                                                                                                                                                  | →E21<br><br>→E21         |
| E31 | Where is your new pick-up point location?<br><i>Drop down</i>                                       | D Clinic.....1<br>G Clinic.....2<br>U21 Clinic.....3<br>K Clinic.....4<br>Gateway Clinic.....5<br>Q Clinic.....6<br>L Clinic.....7<br>H Clinic.....8<br>N Clinic.....9<br>AA Clinic.....10                                                                                                                                                                                               |                          |

Location/Facility: \_\_\_\_\_

Date of BREC Approval: 11NOV2020  
Clean Version

Location/Facility: \_\_\_\_\_

Date of BREC Approval: 11NOV2020  
Clean Version

Today's Date: **day / month / year**

Study ID: \_\_\_\_\_

Interviewer ID: \_\_\_\_\_

Location/Facility: \_\_\_\_\_

|     |                                                                   |                                                                                                                                                                                                                                                                                                                              |                             |
|-----|-------------------------------------------------------------------|------------------------------------------------------------------------------------------------------------------------------------------------------------------------------------------------------------------------------------------------------------------------------------------------------------------------------|-----------------------------|
|     | motivation to take your ARV medication regularly?                 | 3, Yes, decreased motivation to take ARV medication regularly<br>-1, Refused                                                                                                                                                                                                                                                 | → E31                       |
| E41 | If YES, why?                                                      | 1, Difficulty with picking up ARV medication<br>2, Fear of getting very sick from COVID-19<br>3, Fear of taking pills<br>4, Concern about my overall health during the pandemic<br>5, Feeling hopeless<br>6, Fear of going into clinic to collect medication<br>99, Other<br>If OTHER, please describe: _____<br>-1, Refused |                             |
| E42 | Do you think some people are more at-risk of getting coronavirus? | No.....0<br>Yes.....1<br>Unsure.....-2<br>Refused.....-1                                                                                                                                                                                                                                                                     | → E33<br><br>→ E33<br>→ E33 |

Location/Facility: \_\_\_\_\_

|     |                                                                                    |                                                                                                                                                                                                                                                                                                                                                                                                                                                   |                         |
|-----|------------------------------------------------------------------------------------|---------------------------------------------------------------------------------------------------------------------------------------------------------------------------------------------------------------------------------------------------------------------------------------------------------------------------------------------------------------------------------------------------------------------------------------------------|-------------------------|
| E43 | Who do you think is more at-risk of getting coronavirus?<br>(Check all that apply) | Elderly.....1<br>Immunocompromised.....2<br>People living with HIV.....3<br>Pregnant women.....4<br>People living with TB.....5<br>Taxi drivers.....6<br>Healthcare workers.....7<br>Grocery store workers.....8<br>Sex workers.....9<br>Children.....10<br>People who smoke.....11<br>People who have travelled.....12<br>People with cancer.....13<br>People with diabetes.....14<br>Other.....99<br>If OTHER, specify: _____<br>Refused.....-1 |                         |
| E44 | Do you think some people are more at-risk of getting very sick from coronavirus?   | No.....0<br>Yes.....1<br>Unsure.....-2<br>Refused.....-1                                                                                                                                                                                                                                                                                                                                                                                          | → E35<br>→ E35<br>→ E35 |

Today's Date: day / month / year

Study ID: \_\_\_\_\_

Interviewer ID: \_\_\_\_\_

Location/Facility: \_\_\_\_\_

|                                                                              |                                                                                                           |                                                                                                                                                                                                                                                                                                                                                                                                                                                   |          |          |       |                |                      |
|------------------------------------------------------------------------------|-----------------------------------------------------------------------------------------------------------|---------------------------------------------------------------------------------------------------------------------------------------------------------------------------------------------------------------------------------------------------------------------------------------------------------------------------------------------------------------------------------------------------------------------------------------------------|----------|----------|-------|----------------|----------------------|
| E45                                                                          | Who do you think is more at-risk of getting very sick after having coronavirus?<br>(Check all that apply) | Elderly.....1<br>Immunocompromised.....2<br>People living with HIV.....3<br>Pregnant women.....4<br>People living with TB.....5<br>Taxi drivers.....6<br>Healthcare workers.....7<br>Grocery store workers.....8<br>Sex workers.....9<br>Children.....10<br>People who smoke.....11<br>People who have travelled.....12<br>People with cancer.....13<br>People with diabetes.....14<br>Other.....99<br>If OTHER, specify: _____<br>Refused.....-1 |          |          |       |                |                      |
| <b>COVID-Related Stigma</b>                                                  |                                                                                                           |                                                                                                                                                                                                                                                                                                                                                                                                                                                   |          |          |       |                |                      |
| Please tell us how much you agree or disagree with the following statements: |                                                                                                           |                                                                                                                                                                                                                                                                                                                                                                                                                                                   |          |          |       |                |                      |
|                                                                              |                                                                                                           | Strongly disagree                                                                                                                                                                                                                                                                                                                                                                                                                                 | Disagree | Not sure | Agree | Strongly Agree | Prefer Not to Answer |
| E46                                                                          | If someone I knew had coronavirus and recovered, I would be afraid to visit them.                         | 1                                                                                                                                                                                                                                                                                                                                                                                                                                                 | 2        | 3        | 4     | 5              | -1                   |
| E47                                                                          | If I had coronavirus, it would be difficult to tell other people.                                         | 1                                                                                                                                                                                                                                                                                                                                                                                                                                                 | 2        | 3        | 4     | 5              | -1                   |

Location/Facility: \_\_\_\_\_

### F. PHONE: Recent Experiences Seeking Care

|    |                                                                              |                                                                                                                                                                                                                                                         |                  |
|----|------------------------------------------------------------------------------|---------------------------------------------------------------------------------------------------------------------------------------------------------------------------------------------------------------------------------------------------------|------------------|
| F1 | Have you tried to seek care in the past month for any reason other than HIV? | No.....0<br>Yes.....1<br>Refused.....-1                                                                                                                                                                                                                 | → G1<br><br>→ G1 |
| F2 | What did you seek care for during your most recent clinic visit?             | TB.....1<br>Chronic care (such as diabetes, high blood pressure).....2<br>Sexual and reproductive health (such as contraceptive care, antenatal care, STI symptoms)...3<br>Cold/flu.....4<br>Other.....99<br>If OTHER, specify: _____<br>Refused.....-1 |                  |
| F3 | Where did you go for your most recent clinic visit?                          | AA Clinic.....1<br>D Clinic.....2<br>G Clinic.....3<br>H Clinic.....4                                                                                                                                                                                   |                  |

Location/Facility: \_\_\_\_\_

|    |                                                                             |                                                                                                                                                                                                                 |  |
|----|-----------------------------------------------------------------------------|-----------------------------------------------------------------------------------------------------------------------------------------------------------------------------------------------------------------|--|
|    |                                                                             | K Clinic.....5<br>L Clinic.....6<br>N Clinic.....7<br>Q Clinic.....8<br>U21 Clinic.....9<br>Gateway Clinic.....10<br>Ithembalabantu Clinic.....11<br>Other.....99<br>If OTHER, specify: _____<br>Refused.....-1 |  |
| F4 | How far did you travel to attend your most recent clinic visit?             | Less than 5 kilometers.....1<br>5 to 10 kilometers.....2<br>10 to 30 kilometers.....3<br>More than 30 kilometers.....4<br>Refused..... -1<br>Unknown.....-2                                                     |  |
| F5 | What mode of transport did you use to attend your most recent clinic visit? | Walked.....1<br>Public transport (bus, taxi).....2<br>Private transport.....3<br>Other .....99<br>If OTHER, specify: _____<br>Refused..... -1                                                                   |  |
| F6 | How much time did it take for you to get to your most recent clinic visit?  | Time available.....1<br>Refused..... -1<br>Unknown.....-2<br>__ __ hours __ __ minutes                                                                                                                          |  |

Location/Facility: \_\_\_\_\_

|     |                                                                                                                      |                                                                                                                                                 |  |
|-----|----------------------------------------------------------------------------------------------------------------------|-------------------------------------------------------------------------------------------------------------------------------------------------|--|
| F7  | How did the wait length during your most recent clinic experience compare to previous visits?                        | Similar wait length.....1<br>Longer wait.....2<br>Shorter wait.....3<br>Refused.....-1                                                          |  |
| F8  | How crowded was the clinic during your most recent clinic experience compared to previous visits?                    | Same.....1<br>More crowded.....2<br>Less crowded.....3<br>Refused.....-1                                                                        |  |
| F9  | How were you treated by clinic staff during your most recent clinic experience compared to previous visits?          | Worse than usual.....1<br>Same as usual.....2<br>Better than usual.....3<br>Refused.....-1                                                      |  |
| F10 | What screening for COVID did you experience during your most recent clinic experience? <i>(Check all that apply)</i> | 1, No screening<br>2, Symptom screening<br>3, Temperature screening<br>4, Nasal swab<br>5, Other<br>If OTHER, please list: _____<br>-1, Refused |  |

|    |                                                                                                                                    |                                              |                          |
|----|------------------------------------------------------------------------------------------------------------------------------------|----------------------------------------------|--------------------------|
| G1 | Over the past four weeks, have coronavirus and associated regulations affected the ability of you or your household to earn money? | 0, No<br>1, Yes<br>-2, Unsure<br>-1, Refused | → G3<br><br>→ G3<br>→ G3 |
|----|------------------------------------------------------------------------------------------------------------------------------------|----------------------------------------------|--------------------------|

Today's Date: day / month / year

Study ID: \_\_\_\_\_

Interviewer ID: \_\_\_\_\_

Location/Facility: \_\_\_\_\_

|    |                                                                                                                                         |                                                                                                                                                                                                                                                                                                                                                                                                         |                          |
|----|-----------------------------------------------------------------------------------------------------------------------------------------|---------------------------------------------------------------------------------------------------------------------------------------------------------------------------------------------------------------------------------------------------------------------------------------------------------------------------------------------------------------------------------------------------------|--------------------------|
| G2 | If YES, how?<br><i>(Check all that apply)</i>                                                                                           | 1, Additional job<br>2, Lost a job<br>3, Unpaid leave<br>4, Sick family member cannot work<br>99, Other<br>If OTHER, please describe: _____<br>-1, Refused                                                                                                                                                                                                                                              |                          |
| G3 | Have you or your household changed anything you do as a result of financial hardship related to coronavirus and associated regulations? | 0, No<br>1, Yes<br>-2, Unsure<br>-1, Refused                                                                                                                                                                                                                                                                                                                                                            | → G5<br><br>→ G5<br>→ G5 |
| G4 | If YES, what changed?                                                                                                                   | 1, Buy less food<br>2, Leave where you were living<br>3, Take on additional jobs<br>4, Do not buy airtime<br>5, Do not pay rent<br>6, Not able to pay electricity or water bill<br>7, Not able to pay for transport for children or self<br>8, Not able to pay for car insurance<br>9, Not able to pay school fees for children or self<br>99, Other<br>If OTHER, please describe: _____<br>-1, Refused |                          |
| G5 | Have you or anyone in your household had any changes in housing related to                                                              | 0, No<br>1, Yes<br>-2, Unsure<br>-1, Refused                                                                                                                                                                                                                                                                                                                                                            | → G8<br><br>→ G8<br>→ G8 |

Today's Date: day / month / year

Study ID: \_\_\_\_\_

Interviewer ID: \_\_\_\_\_

Location/Facility: \_\_\_\_\_

|                                        |                                                                                                                                           |                                                                                                                                                                                                                                               |                             |
|----------------------------------------|-------------------------------------------------------------------------------------------------------------------------------------------|-----------------------------------------------------------------------------------------------------------------------------------------------------------------------------------------------------------------------------------------------|-----------------------------|
|                                        | coronavirus and associated regulations?                                                                                                   |                                                                                                                                                                                                                                               |                             |
| G6                                     | If YES, what changes?                                                                                                                     | 1, Left where you were living for a family or friend's home<br>2, Family members or friends moved in with you<br>3, Household members moved out<br>4, Lost housing (homeless)<br>99, Other<br>If OTHER, please describe: _____<br>-1, Refused |                             |
| G7                                     | After coronavirus and associated regulations have passed, do you expect your housing to return back to the way it was or remain this way? | 1, Housing changes are temporary<br>2, Housing changes are permanent<br>-2, Unsure<br>-1, Refused                                                                                                                                             |                             |
| <b>G8 – G26: Food Insecurity Scale</b> |                                                                                                                                           |                                                                                                                                                                                                                                               |                             |
| G8                                     | In the past four weeks, did you worry that your household would not have enough food?                                                     | 0, No<br>1, Yes<br>-2, Unsure<br>-1, Refused                                                                                                                                                                                                  | → G10<br><br>→ G10<br>→ G10 |
| G9                                     | If YES, how often did this happen?                                                                                                        | 1, Rarely (once or twice in the past four weeks)<br>2, Sometimes (three to ten times in the past four weeks)<br>3, Often (more than ten times in the past four weeks)                                                                         |                             |
| G10                                    | In the past four weeks, were you or any household member not able to eat the kinds of foods you preferred                                 | 0, No<br>1, Yes<br>-2, Unsure<br>-1, Refused                                                                                                                                                                                                  | → G12<br><br>→ G12<br>→ G12 |

Today's Date: day / month / year

Study ID: \_\_\_\_\_

Interviewer ID: \_\_\_\_\_

Location/Facility: \_\_\_\_\_

|     |                                                                                                                                                                                  |                                                                                                                                                                       |                             |
|-----|----------------------------------------------------------------------------------------------------------------------------------------------------------------------------------|-----------------------------------------------------------------------------------------------------------------------------------------------------------------------|-----------------------------|
|     | because of a lack of resources?                                                                                                                                                  |                                                                                                                                                                       |                             |
| G11 | If YES, how often did this happen?                                                                                                                                               | 1, Rarely (once or twice in the past four weeks)<br>2, Sometimes (three to ten times in the past four weeks)<br>3, Often (more than ten times in the past four weeks) |                             |
| G12 | In the past four weeks, did you or any household member have to eat a limited variety of foods due to a lack of resources?                                                       | 0, No<br>1, Yes<br>-2, Unsure<br>-1, Refused                                                                                                                          | → G14<br><br>→ G14<br>→ G14 |
| G13 | If YES, how often did this happen?                                                                                                                                               | 1, Rarely (once or twice in the past four weeks)<br>2, Sometimes (three to ten times in the past four weeks)<br>3, Often (more than ten times in the past four weeks) |                             |
| G14 | In the past four weeks, did you or any household member have to eat some foods that you really did not want to eat because of a lack of resources to obtain other types of food? | 0, No<br>1, Yes<br>-2, Unsure<br>-1, Refused                                                                                                                          | → G16<br><br>→ G16<br>→ G16 |
| G15 | If YES, how often did this happen?                                                                                                                                               | 1, Rarely (once or twice in the past four weeks)<br>2, Sometimes (three to ten times in the past four weeks)<br>3, Often (more than ten times in the past four weeks) |                             |
| G16 | In the past four weeks, did you or any household member have to eat a smaller meal than you felt you                                                                             | 0, No<br>1, Yes<br>-2, Unsure<br>-1, Refused                                                                                                                          | → G18<br><br>→ G18<br>→ G18 |

Location/Facility: \_\_\_\_\_

|     |                                                                                                                               |                                                                                                                                                                       |                             |
|-----|-------------------------------------------------------------------------------------------------------------------------------|-----------------------------------------------------------------------------------------------------------------------------------------------------------------------|-----------------------------|
|     | needed because there was not enough food?                                                                                     |                                                                                                                                                                       |                             |
| G17 | If YES, how often did this happen?                                                                                            | 1, Rarely (once or twice in the past four weeks)<br>2, Sometimes (three to ten times in the past four weeks)<br>3, Often (more than ten times in the past four weeks) |                             |
| G18 | In the past four weeks, did you or any household member have to eat fewer meals in a day because there was not enough food?   | 0, No<br>1, Yes<br>-2, Unsure<br>-1, Refused                                                                                                                          | → G20<br><br>→ G20<br>→ G20 |
| G19 | If YES, how often did this happen?                                                                                            | 1, Rarely (once or twice in the past four weeks)<br>2, Sometimes (three to ten times in the past four weeks)<br>3, Often (more than ten times in the past four weeks) |                             |
| G20 | In the past four weeks, was there ever no food to eat of any kind in your household because of lack of resources to get food? | 0, No<br>1, Yes<br>-2, Unsure<br>-1, Refused                                                                                                                          | → G22<br><br>→ G22<br>→ G22 |
| G21 | If YES, how often did this happen?                                                                                            | 1, Rarely (once or twice in the past four weeks)<br>2, Sometimes (three to ten times in the past four weeks)<br>3, Often (more than ten times in the past four weeks) |                             |
| G22 | In the past four weeks, did you or any household member go to sleep at night hungry because there was not enough food?        | 0, No<br>1, Yes<br>-2, Unsure<br>-1, Refused                                                                                                                          | → G24<br><br>→ G24<br>→ G24 |

Location/Facility: \_\_\_\_\_

|     |                                                                                                                                                                                                        |                                                                                                                                                                                                                                                                                                                                                                                                                       |                             |
|-----|--------------------------------------------------------------------------------------------------------------------------------------------------------------------------------------------------------|-----------------------------------------------------------------------------------------------------------------------------------------------------------------------------------------------------------------------------------------------------------------------------------------------------------------------------------------------------------------------------------------------------------------------|-----------------------------|
| G23 | If YES, how often did this happen?                                                                                                                                                                     | 1, Rarely (once or twice in the past four weeks)<br>2, Sometimes (three to ten times in the past four weeks)<br>3, Often (more than ten times in the past four weeks)                                                                                                                                                                                                                                                 |                             |
| G24 | In the past four weeks, did you or any household member go a whole day and night without eating anything because there was not enough food?                                                            | 0, No<br>1, Yes<br>-2, Unsure<br>-1, Refused                                                                                                                                                                                                                                                                                                                                                                          | → G27<br><br>→ G27<br>→ G27 |
| G25 | If YES, how often did this happen?                                                                                                                                                                     | 1, Rarely (once or twice in the past four weeks)<br>2, Sometimes (three to ten times in the past four weeks)<br>3, Often (more than ten times in the past four weeks)                                                                                                                                                                                                                                                 |                             |
| G26 | <i>Branching: If YES to any of G8, G10, G12, G14, G16, G18, G20, G22, G24:</i><br><br>During the time of coronavirus and associated regulations, what were the reasons you did not have enough to eat? | 1, Couldn't afford to buy more food<br>2, Couldn't get out to buy food (for example, didn't have transportation, or had mobility or health problems that prevented you from getting out)<br>3, Afraid to go or didn't want to go out to buy food<br>4, Couldn't get groceries or meals delivered to me<br>5, The stores didn't have the food I wanted<br>99, Other<br>If OTHER, please describe: _____<br>-1, Refused |                             |
|     |                                                                                                                                                                                                        |                                                                                                                                                                                                                                                                                                                                                                                                                       |                             |
| G27 | Over the past four weeks, have you had access to soap or water at home for hand hygiene?                                                                                                               | 0, No<br>1, Yes<br>-1, Refused                                                                                                                                                                                                                                                                                                                                                                                        |                             |

Location/Facility: \_\_\_\_\_

|     |                                                                                              |                                                                                                                                          |                    |
|-----|----------------------------------------------------------------------------------------------|------------------------------------------------------------------------------------------------------------------------------------------|--------------------|
| G28 | What is your primary method of transportation during coronavirus and associated regulations? | 1, Walk<br>2, Public transport<br>3, Private transport<br>99, Other<br>If OTHER, please describe: _____<br>-1, Refused                   |                    |
| G29 | Have your methods of transportation changed due to coronavirus and associated regulations?   | 0, No<br>1, Yes<br>-1, Refused                                                                                                           | → G32<br><br>→ G32 |
| G30 | If YES, what was it before coronavirus and associated regulations?                           | 1, Walk<br>2, Public transport<br>3, Private transport<br>99, Other<br>If OTHER, please describe: _____<br>-1, Refused                   |                    |
| G31 | What were your reasons for changing your method of transportation?                           | 1, Regulations<br>2, Costs<br>3, Fear of coronavirus<br>4, Fear of crime<br>99, Other<br>If OTHER, please describe: _____<br>-1, Refused |                    |
| G32 | Has your consumption of cigarettes changed due to coronavirus and associated regulations?    | 1, Yes, increased<br>2, No, stayed the same<br>3, Yes, decreased<br>4, Do not use cigarettes<br>-2, Unsure                               |                    |

Location/Facility: \_\_\_\_\_

Date of BREC Approval: 11NOV2020  
Clean Version

Today's Date:      **day / month / year**

Study ID:      \_\_\_\_\_

Interviewer ID:      \_\_\_\_\_

Location/Facility:      \_\_\_\_\_

|     |                                                                                                                   |                                                                                                                                                                                                                                                                                                               |                             |
|-----|-------------------------------------------------------------------------------------------------------------------|---------------------------------------------------------------------------------------------------------------------------------------------------------------------------------------------------------------------------------------------------------------------------------------------------------------|-----------------------------|
|     |                                                                                                                   | 99, Other<br>If OTHER, please describe: _____<br>-1, Refused                                                                                                                                                                                                                                                  |                             |
| G37 | Did any parts of your lifestyle change during the first switch from level 4 to level 3 of lockdown?               | 0, No<br>1, Yes<br>-2, Unsure<br>-1, Refused                                                                                                                                                                                                                                                                  | → G39<br><br>→ G39<br>→ G39 |
| G38 | If YES, what parts of your lifestyle changed during the first switch from level 4 to level 3 of the lockdown?     | 1, Transportation<br>2, Food security<br>3, Housing<br>4, Hygiene (soap/water access)<br>5, Cigarette consumption<br>6, Alcohol consumption<br>7, Clinic access<br>8, Pharmacy access<br>9, Ability to pick up medications<br>10, Work/school<br>99, Other<br>If OTHER, please describe: _____<br>-1, Refused |                             |
| G39 | Did you or your household feel prepared to resume work/school during the first switch to level 3 of the lockdown? | 0, No<br>1, Yes<br>2, Not applicable (no work/school)<br>-2, Unsure<br>-1, Refused                                                                                                                                                                                                                            |                             |
| G40 | Did you leave your home for essential activities during                                                           | 0, No<br>1, Yes<br>-2, Unsure                                                                                                                                                                                                                                                                                 | → G42<br><br>→ G42          |

Today's Date: day / month / year

Study ID: \_\_\_\_\_

Interviewer ID: \_\_\_\_\_

Location/Facility: \_\_\_\_\_

|     |                                                                                                                                         |                                                                                                                                                                                                      |                          |
|-----|-----------------------------------------------------------------------------------------------------------------------------------------|------------------------------------------------------------------------------------------------------------------------------------------------------------------------------------------------------|--------------------------|
|     | initial levels 4 and 5 of the national lockdown?                                                                                        | -1, Refused                                                                                                                                                                                          | → G42                    |
| G41 | What essential activities did you leave your home for during initial levels 4 and 5 of the national lockdown?<br>(Check all that apply) | 1, Work<br>2, Food<br>3, Household supplies<br>4, Clinic/pharmacy<br>5, Visit friends/family<br>6, School<br>7, Take child to school<br>99, Other<br>If OTHER, please describe: _____<br>-1, Refused |                          |
| G42 | Did you leave Umlazi during initial levels 4 and 5 of the national lockdown?                                                            | 0, No<br>1, Yes<br>-2, Unsure<br>-1, Refused                                                                                                                                                         | → H1<br><br>→ H1<br>→ H1 |
| G43 | What were the primary reasons you travelled outside of Umlazi?<br>(Check all that apply)                                                | 1, Go home to be with family<br>2, Looking for job<br>3, Could not afford to stay<br>4, Work<br>5, Visit friends/family<br>6, School<br>99, Other<br>If OTHER, please describe: _____<br>-1, Refused |                          |
| G44 | Did you leave KZN during initial levels 4 and 5 of the national lockdown?                                                               | 0, No<br>1, Yes<br>-2, Unsure                                                                                                                                                                        | → G47<br><br>→ G47       |

Today's Date: day / month / year

Study ID: \_\_\_\_\_

Interviewer ID: \_\_\_\_\_

Location/Facility: \_\_\_\_\_

|     |                                                                                              |                                                                                                                                                                                                      |                             |
|-----|----------------------------------------------------------------------------------------------|------------------------------------------------------------------------------------------------------------------------------------------------------------------------------------------------------|-----------------------------|
|     |                                                                                              | -1, Refused                                                                                                                                                                                          | → G47                       |
| G45 | Which province(s) did you travel to?<br><i>(Check all that apply)</i>                        | 1, Eastern Cape<br>2, Free State<br>3, Gauteng<br>4, Limpopo<br>5, Mpumalanga<br>6, Northern Cape<br>7, North West<br>8, Western Cape<br>9, Foreign travel<br>-2, Unsure<br>-1, Refused              |                             |
| G46 | What were the primary reasons you travelled outside of KZN?<br><i>(Check all that apply)</i> | 1, Go home to be with family<br>2, Looking for job<br>3, Could not afford to stay<br>4, Work<br>5, Visit friends/family<br>6, School<br>99, Other<br>If OTHER, please describe: _____<br>-1, Refused |                             |
| G47 | Do you plan to return to Durban/Umlazi?                                                      | 0, No<br>1, Yes<br>-2, Unsure<br>-1, Refused                                                                                                                                                         | → G51<br><br>→ G51<br>→ G51 |
| G48 | When did or do you plan to return to Durban/Umlazi?                                          | ___ / ___ / ____<br><i>(dd / mmm / yyyy)</i><br>[Day: 01-31; Unknown if unknown (pull down)]                                                                                                         |                             |

Location/Facility: \_\_\_\_\_

Date of BREC Approval: 11NOV2020  
Clean Version

Location/Facility: \_\_\_\_\_

Date of BREC Approval: 11NOV2020  
Clean Version

Today's Date: day / month / year

Study ID: \_\_\_\_\_

Interviewer ID: \_\_\_\_\_

Location/Facility: \_\_\_\_\_

|  |  |                                                                                                                                                                   |  |
|--|--|-------------------------------------------------------------------------------------------------------------------------------------------------------------------|--|
|  |  | 3, Dizziness<br>4, Vivid dreams<br>5, Insomnia<br>6, Depression or other mood symptoms<br>7, Rash<br>99, Other<br>If OTHER, please describe: _____<br>-1, Refused |  |
|--|--|-------------------------------------------------------------------------------------------------------------------------------------------------------------------|--|

#### **H. PHONE: Emotional Health, Depression Screening, Perceived Stress Scale**

In this section, I will ask you some questions about your emotional wellbeing. Please answer to the best of your recollection. If you find any of the questions too personal, you do not have to answer them. However, your answers are important to us, so please answer all of the questions that you are comfortable with.

|    |                                                                              |                                                                                                                                                                                      |  |
|----|------------------------------------------------------------------------------|--------------------------------------------------------------------------------------------------------------------------------------------------------------------------------------|--|
| H1 | During the past month, how much of the time were you a happy person?         | All of the time.....1<br>Most of the time.....2<br>A good bit of the time.....3<br>Some of the time.....4<br>A little of the time.....5<br>None of the time.....6<br>Refused..... -1 |  |
| H2 | During the past month, how much of the time have you felt calm and peaceful? | All of the time.....1<br>Most of the time.....2<br>A good bit of the time.....3<br>Some of the time.....4<br>A little of the time.....5<br>None of the time.....6<br>Refused..... -1 |  |

Location/Facility: \_\_\_\_\_

|    |                                                                                                   |                                                                                                                                                                                      |  |
|----|---------------------------------------------------------------------------------------------------|--------------------------------------------------------------------------------------------------------------------------------------------------------------------------------------|--|
| H3 | During the past month, how much of the time have you been a very nervous person?                  | All of the time.....1<br>Most of the time.....2<br>A good bit of the time.....3<br>Some of the time.....4<br>A little of the time.....5<br>None of the time.....6<br>Refused..... -1 |  |
| H4 | During the past month, how much of the time have you felt very sad, downhearted, or blue?         | All of the time.....1<br>Most of the time.....2<br>A good bit of the time.....3<br>Some of the time.....4<br>A little of the time.....5<br>None of the time.....6<br>Refused..... -1 |  |
| H5 | During the past month, how much of the time have you felt so sad that nothing could cheer you up? | All of the time.....1<br>Most of the time.....2<br>A good bit of the time.....3<br>Some of the time.....4<br>A little of the time.....5<br>None of the time.....6<br>Refused..... -1 |  |
| H6 | How much of the time was your nervousness or sadness related to coronavirus?                      | All of the time.....1<br>Most of the time.....2<br>A good bit of the time.....3<br>Some of the time.....4<br>A little of the time.....5<br>None of the time.....6<br>Refused..... -1 |  |

Location/Facility: \_\_\_\_\_

Date of BREC Approval: 11NOV2020  
Clean Version



Today's Date:        day / month / year

Study ID:                \_\_\_\_\_

Interviewer ID:        \_\_\_\_\_

Location/Facility:     \_\_\_\_\_

We know that relationships can have good and bad moments. Some questions may be difficult to answer and we would like to remind you that your answers will be kept confidential. If you find any of the questions too personal, you do not have to answer them. However, your answers are important to us, so please answer all of the questions that you are comfortable with.

|    |                                                                                                                                                                             |                                              |  |
|----|-----------------------------------------------------------------------------------------------------------------------------------------------------------------------------|----------------------------------------------|--|
| J1 | In the past four weeks, has your current or most recent partner punched, slapped, kicked, bit you, or caused you any type of physical harm?                                 | 0, No<br>1, Yes<br>-2, Unsure<br>-1, Refused |  |
| J2 | In the past four weeks, has your current or most recent partner insulted, ignored, or humiliated you, yelled at you, or made you feel ashamed or bad about yourself?        | 0, No<br>1, Yes<br>-2, Unsure<br>-1, Refused |  |
| J3 | In the past four weeks, has your current or most recent partner forced you to have sex or perform any sexual act, or touched you sexually in any way that you did not want? | 0, No<br>1, Yes<br>-2, Unsure<br>-1, Refused |  |
| J4 | In the past four weeks, has your current or most recent partner made you feel afraid, unsafe, or in danger?                                                                 | 0, No<br>1, Yes<br>-2, Unsure<br>-1, Refused |  |

Location/Facility: \_\_\_\_\_

|    |                                                                                                       |                                                                                             |  |
|----|-------------------------------------------------------------------------------------------------------|---------------------------------------------------------------------------------------------|--|
| J5 | Have you experienced any of the above more or less during coronavirus and the associated regulations? | 1, Yes, more frequent<br>2, No change<br>3, Yes, less frequent<br>-2, Unsure<br>-1, Refused |  |
|----|-------------------------------------------------------------------------------------------------------|---------------------------------------------------------------------------------------------|--|

## K. PHONE: Qualitative Follow-Up Questions

The final part is a series of open-ended questions about your experiences during the COVID-19/coronavirus outbreak. Please answer all of the questions that you are comfortable with.

|    |                                                                                                                            |  |
|----|----------------------------------------------------------------------------------------------------------------------------|--|
| K1 | How much, if at all, do you think your HIV status puts you at a greater risk of getting sick from coronavirus? If so, how? |  |
| K2 | Is coronavirus impacting your access to ARV medications in any ways other than what we have discussed? If so, how?         |  |

## L. PHONE: Reimbursement Questions

|    |                                                                                                 |                                                                                                         |      |
|----|-------------------------------------------------------------------------------------------------|---------------------------------------------------------------------------------------------------------|------|
| L1 | Can we send you your incentive on this phone number, or is there another number that is better? | Same as this phone number.....1<br>Different.....2<br>If DIFFERENT, specify:<br>_____<br>Refused.....-1 | →END |
| L2 | Phone carrier/provider:                                                                         | 1, Cell-C<br>2, MTN                                                                                     |      |

Today's Date: **day / month / year**

Study ID: \_\_\_\_\_

Interviewer ID: \_\_\_\_\_

Location/Facility: \_\_\_\_\_

|    |                       |                                                               |  |
|----|-----------------------|---------------------------------------------------------------|--|
|    |                       | 3, Telkom<br>4, Vodacom<br>99, OTHER<br>If OTHER, list: _____ |  |
| L3 | Airtime voucher code: | <i>Text</i>                                                   |  |
